# Supplementary material
Source: ML conference proceedings conference paper supplement (https://openreview.net/forum?id=3AbyfpQgR2)
Supplement: supplementary_material [file ap_hash.xlsx]

## Sheet: Sheet1
ap_name	x_axis	y_axis	z_axis	floor
11330	14221.6	10075	307.4	5
11331	12701.6	10075	307.3	5
11332	11195.6	10075	313.9	5
11333	9705.6	10075	313.9	5
11338	15802	10075	304.4	5
12240	10051.3	9940	44	5
12242	13919.9	9940	45.1	5
12243	14221.8	9940	42.9	5
12245	9424.4	9940	45	5
12246	9733	9940	44	5
12247	11514.5	9940	45.9	5
12248	11218.5	9940	44.9	5
12250	15126.3	9940	45.1	5
12251	15848.4	9940	44.5	5
12252	14527.5	9940	44.1	5
12253	12439.1	9940	46.5	5
12254	12102.9	9940	46.5	5
12255	13039.6	9940	43.7	5
12256	13318.6	9940	45.7	5
12257	13627.6	9940	46.4	5
12258	12704.3	9940	45.3	5
12259	14837.3	9940	45.1	5
11274	10773	9648.1	284.2	5
11411	15198.4	10220	307.2	5
11407	9797.1	10220	290.4	5
11408	10789.3	10220	298.8	5
11409	11567.4	10220	298.1	5
11410	14281.4	10220	299.6	5
11329	3656	10054	344.1	5
11334	8712	10054	307.8	5
11335	8217	10054	314.3	5
11336	6605	10054	305.7	5
11337	5231	10054	304	5
12215	4927.9	9919	45.2	5
12223	5217.3	9919	46	5
12224	5519.6	9919	45.4	5
12232	5809.1	9919	46.4	5
12234	6106.6	9919	46	5
12235	7302.9	9919	46.6	5
12236	7302.9	9919	46.4	5
12237	6409.7	9919	45.7	5
12238	6712.9	9919	46	5
12239	7910.5	9919	43.3	5
12241	8226.7	9919	43.8	5
12244	7604	9919	45.9	5
12249	5807.6	9919	46.2	5
11273	8709.1	9747.4	365.5	5
11403	5270.6	10199	287.1	5
11404	6177.5	10199	292.3	5
11405	7066.3	10199	295.2	5
11406	7977.1	10199	295.8	5
