# Supplementary material
Source: ML conference proceedings conference paper supplement (https://openreview.net/forum?id=3AbyfpQgR2)
Supplement: supplementary_material [file ap_hash.xlsx]

## Sheet: Sheet1
ap_name	x_axis	y_axis	z_axis	floor	area
11254	7017.8	5854	276	2	A
11255	6434	5315	309.2	2	A
11256	5054	5363	310.3	2	A
11257	3453	5364	280.7	2	A
11258	2040.3	5321.7	344.1	2	A
11259	3058	3667	274.3	2	A
11260	3064	2115	275.2	2	A
11261	2583.8	1142.8	333.4	2	A
11364	5557	1240	274.4	2	A
11370	4841.9	1850.7	275.2	2	A
11371	4018	1214	275	2	A
11372	1083.8	1142.8	301.6	2	A
11381	7065	4345	274.9	2	A
11382	7065	1530	373.6	2	A
11389	7065	2916	273.5	2	A
12169	6645.6	5220	34	2	A
12291	4560	1693.7	34.1	2	A
12298	5650	2380	31	2	A
12299	6130	2380	31.2	2	A
12306	5847.8	5220	32.7	2	A
11416	7220	2426.8	320.4	2	A
11419	4026.6	1002.7	330.7	2	A
11470	1855.1	6013	300	2	A
11474	453.5	1340	317.9	2	A
11412	7220	6005	314.3	2	A
11413	7220	5134.5	322.8	2	A
11414	7220	4230	322	2	A
11415	7220	3357.4	284.7	2	A
11417	5823.5	1002.7	318.3	2	A
11418	4928.8	1002.7	322.8	2	A
11420	3139.6	1002.7	317.4	2	A
11421	2200.8	1002.7	316.1	2	A
11422	1303	1002.7	312.6	2	A
11423	412.2	1040	294.4	2	A
11469	1416.2	6013	300	2	A
11471	2760	4245.4	300.8	2	A
11472	2760	3344.7	308	2	A
11473	2760	2442.7	301.6	2	A
