# Supplementary material
Source: ML conference proceedings conference paper supplement (https://openreview.net/forum?id=3AbyfpQgR2)
Supplement: supplementary_material [file ap_hash.xlsx]

## Sheet: ap_hash
ap_name	x_axis	y_axis	z_axis	floor
11463	1331.5	1039.9	319.8	3
11250	4249.1	4964.4	275.5	3
11251	4889	5280.1	274.9	3
11347	6531.7	6002	274.5	3
11348	6179.5	4199.3	275.4	3
11349	6179.5	3073.8	275	3
11355	6179.5	1573.8	274.9	3
11373	1808.1	1147.8	330	3
11374	260.1	1279.9	283.4	3
11375	1060	1908.5	284.8	3
11376	1060	3408.5	295.3	3
11377	1060	4908.5	294.5	3
11378	483.2	5363.2	295.6	3
11379	1992	5354.1	274.6	3
11380	3492	5363.2	275	3
11383	4990	2128.6	274.4	3
11384	5010.6	1147.8	275	3
11385	4118.9	1664	275	3
11386	3010.9	1160.6	274.9	3
11387	2200.1	4084.2	273.1	3
11388	2200.1	2584.2	275.3	3
11455	483.2	5500	300.5	3
11456	1385.9	5537.2	300.3	3
11457	3186	5500	309.1	3
11458	4946.9	5500	300.2	3
11459	5894.4	5500	309.1	3
11460	4027.5	1039.9	313.4	3
11461	3135.3	1039.9	309	3
11462	2230.8	1039.9	319	3
11464	435.6	1039.9	320.5	3
11465	960	2372.9	309.2	3
12160	4739.8	4190	32.5	3
12163	3569	5219.9	33.1	3
12165	1550	2809.9	37.8	3
12172	3145	1320	32.3	3
12175	1550	4579.9	32	3
12176	5230	4190	33.4	3
12183	4855.7	1320	32	3
12316	2790.4	5219.9	32	3
12325	1550	3709.9	31.6	3
12332	5467.7	1320	32.2	3
11466	922.8	3320	318.7	3
11467	922.8	4155.7	302.7	3
11468	922.8	5079.1	303	3
11362	5010.6	1039.9	353.6	3
