# Supplementary material
Source: ML conference proceedings conference paper supplement (https://openreview.net/forum?id=3AbyfpQgR2)
Supplement: supplementary_material [file ap_hash.xlsx]

## Sheet: Sheet1
ap_name	x_axis	y_axis	z_axis	floor
11318	4649	1132	316.2	4
11319	304.3	1148.5	310.2	4
11320	3119	1132	314.5	4
11321	1539	1132	334.6	4
11339	3647	5317	311.9	4
11340	5231	5319	311.5	4
11341	6270	5340	278.8	4
11342	7222	5274	332.6	4
11343	7255	4615	296.2	4
11344	7255	3113	295.2	4
11345	7255	1590	296.2	4
11346	6032	1132	284.4	4
11350	1297	2083	321.8	4
11351	1297	3288	293.4	4
11352	1297	4519	294.5	4
11353	464.2	5159.6	297.4	4
11354	1858	5319	315.5	4
11436	641.2	5477.2	297.4	4
11441	1583.4	5477.2	296.1	4
11442	3383.2	5477.2	307.4	4
11443	5130.4	5477.2	296.9	4
11444	6072.9	5477.2	297.4	4
11445	7065.6	5477.2	296.9	4
11446	5140.1	942.7	296.5	4
11447	4225.8	942.7	295.5	4
11448	3337.4	942.7	297.2	4
11449	2430.5	942.7	296.6	4
11450	1527	942.7	296.6	4
11451	635.2	942.7	296.6	4
11452	907.8	2260.6	287.1	4
11453	907.8	3904.1	287.4	4
11454	1117.8	4990	287.4	4
12369	7451.6	5568	34.9	4
12161	2075	3180	32.9	4
12164	7415	3789	33.3	4
12166	6690.7	4070.8	32.8	4
12171	6690.7	3250	32.9	4
12173	7415	4457	34.9	4
12174	7415	2862.1	34.4	4
12178	2075	2910	32.9	4
12179	7415	3573	33.3	4
12180	7451.6	5361	33	4
12181	7415	1984.6	35.5	4
12182	7451.6	4695	34.9	4
12184	2038.5	3799.5	33.7	4
12185	2075	3490	33.7	4
12186	3097.9	1870.8	33.9	4
12187	3372.7	1870.8	32.8	4
12188	4287.6	1870.8	33.4	4
12189	3085	4520	34	4
12190	3355	4520	34.2	4
12191	4885.7	4520	32.4	4
12192	2075	4371.9	34.6	4
12193	6690.7	2350	33.4	4
12194	3670.8	1870.8	32.8	4
12195	2205	1899.9	31.8	4
12196	2478	1870.8	33.4	4
12197	2732.9	4520	33.4	4
12198	4264	4520	33.4	4
12199	3674.9	4520	33.1	4
12200	2075	4105.9	35.2	4
12201	2754.7	1870.8	33.9	4
12202	3989.8	1870.8	33.9	4
12203	4563.1	1870.8	33.9	4
12205	4884.6	1870.8	33.9	4
12206	5477.6	1870.8	34.1	4
12207	5165.3	1870.8	34.1	4
12208	3997.3	4520	32.9	4
12209	5776	4520	33.3	4
12317	6690.7	4150	32.6	4
12333	5460.8	4520	32.5	4
12334	6690.7	2271.8	31.7	4
12362	6690.7	3170.8	32.1	4
12370	4568.6	4520	33.6	4
12378	5168.2	4520	33	4
12379	5796.1	1870.8	34.9	4
12380	6073.6	4520	32.6	4
11285	7198	521	297.4	4
12170	7415	2663	34.8	4
